# Supplementary material for: Severe airport sanitarian control could slow down the spreading of COVID-19 pandemics in Brazil
Source: PeerJ. 2020 Jun 25;8:e9446. doi: 10.7717/peerj.9446 (PMC7321664; doi:10.7717/peerj.9446)
Supplement: Supplemental Information 2 — The spreadsheet presents all the 120 cities with airport(s), their state, latitude and longitude, followed by the closeness centrality in the network. The columns t0 to t90 are the times from 0 to 90 days. Lines for the time columns are the percentage of infected people per city per time. [file peerj-08-9446-s002.xls]

## Sheet: Sheet1
Municipality	State	Latitude	Longitude	Closeness_Centrality	t0	t1	t2	t3	t4	t5	t6	t7	t8	t9	t10	t11	t12	t13	t14	t15	t16	t17	t18	t19	t20	t21	t22	t23	t24	t25	t26	t27	t28	t29	t30	t31	t32	t33	t34	t35	t36	t37	t38	t39	t40	t41	t42	t43	t44
BAURU E AREALVA	SP	-22.1578	-49.0683	0.43956	0	0	0	0	0	0	0	0	1e-06	1e-06	2e-06	2e-06	4e-06	5e-06	8e-06	1.1e-05	1.5e-05	2.2e-05	3.1e-05	4.3e-05	6e-05	8.4e-05	0.000116	0.00016	0.00022	0.000303	0.000415	0.000568	0.000776	0.001059	0.001441	0.001959	0.002659	0.003605	0.004882	0.006603	0.008921	0.012041	0.016234	0.021867	0.029424	0.039553	0.053111	0.071239	0.095442
ARACAJU	SE	-10.9853	-37.0733	0.472441	0	0	0	0	1e-06	1e-06	3e-06	4e-06	7e-06	1.1e-05	1.7e-05	2.6e-05	3.9e-05	5.7e-05	8.3e-05	0.000119	0.00017	0.000241	0.000339	0.000475	0.000663	0.000921	0.001275	0.001759	0.002422	0.003325	0.004555	0.006228	0.008497	0.011574	0.015738	0.021369	0.028974	0.039233	0.053058	0.071668	0.096693	0.130309	0.175416	0.23587	0.316792	0.424959	0.569317	0.761621	1.01725
ALTA FLORESTA	MT	-9.86639	-56.105	0.433213	0	0	0	0	0	0	0	0	0	0	0	0	0	0	0	0	0	1e-06	1e-06	1e-06	2e-06	3e-06	4e-06	6e-06	9e-06	1.3e-05	1.9e-05	2.7e-05	3.8e-05	5.4e-05	7.6e-05	0.000107	0.000151	0.000212	0.000297	0.000414	0.000577	0.000803	0.001115	0.001545	0.002137	0.002952	0.004072	0.005607	0.00771
ARACATUBA	SP	-21.1442	-50.4264	0.416667	0	0	0	0	0	0	0	0	0	0	0	0	0	0	0	0	0	0	0	1e-06	1e-06	2e-06	2e-06	4e-06	5e-06	8e-06	1.1e-05	1.6e-05	2.3e-05	3.4e-05	4.8e-05	6.9e-05	9.8e-05	0.000138	0.000195	0.000276	0.000388	0.000545	0.000764	0.00107	0.001494	0.002084	0.002901	0.004032	0.005597
ARAXA	MG	-19.5606	-46.9656	0.416667	0	0	0	0	0	0	0	0	0	0	0	0	0	0	0	0	1e-06	1e-06	1e-06	2e-06	3e-06	5e-06	7e-06	1.1e-05	1.5e-05	2.2e-05	3.2e-05	4.5e-05	6.5e-05	9.2e-05	0.000131	0.000184	0.00026	0.000365	0.000511	0.000715	0.000998	0.00139	0.001932	0.002681	0.003715	0.005137	0.007094	0.00978	0.013464
BELEM	PA	-1.38472	-48.4789	0.521739	0	0	0	0	1e-06	1e-06	3e-06	5e-06	7e-06	1.2e-05	1.8e-05	2.7e-05	4e-05	5.9e-05	8.6e-05	0.000124	0.000177	0.00025	0.000353	0.000495	0.000692	0.000963	0.001335	0.001845	0.002543	0.003497	0.004798	0.006569	0.008977	0.012245	0.016676	0.022676	0.030792	0.041758	0.056557	0.076509	0.103382	0.139536	0.188124	0.253349	0.340797	0.457878	0.614391	0.823236	1.10132
BELO HORIZONTE	MG	-19.8519	-43.9506	0.5	0	0	0	0	0	0	0	0	0	0	0	0	0	0	1e-06	1e-06	1e-06	2e-06	3e-06	4e-06	6e-06	8e-06	1.1e-05	1.5e-05	2.1e-05	3e-05	4.1e-05	5.7e-05	7.9e-05	0.000109	0.00015	0.000206	0.000283	0.000387	0.00053	0.000725	0.00099	0.001351	0.001841	0.002507	0.00341	0.004635	0.006295	0.00854	0.011577
BRASILIA	DF	-15.8711	-47.9186	0.65	0	0	0	1e-06	1e-06	3e-06	5e-06	8e-06	1.4e-05	2.2e-05	3.4e-05	5.2e-05	7.7e-05	0.000114	0.000165	0.000239	0.000342	0.000487	0.000689	0.000971	0.001361	0.001901	0.002646	0.003671	0.005079	0.00701	0.009652	0.013263	0.01819	0.024902	0.034035	0.046445	0.06329	0.086126	0.11705	0.158879	0.215393	0.291657	0.394443	0.532785	0.718696	0.968092	1.30195	1.74777	2.34128
BOA VISTA	RR	2.84139	-60.6922	0.458015	0	0	0	0	0	0	0	0	0	0	0	0	0	0	1e-06	1e-06	2e-06	3e-06	4e-06	6e-06	9e-06	1.4e-05	2e-05	3e-05	4.3e-05	6.2e-05	8.9e-05	0.000128	0.000182	0.000259	0.000367	0.000518	0.00073	0.001026	0.001438	0.002012	0.002808	0.003912	0.005439	0.007549	0.01046	0.014469	0.019983	0.027557	0.037943
BARRA DO GARAS	MT	-15.8608	-52.3894	0.37	0	0	0	0	0	0	0	0	0	0	0	0	0	0	0	0	1e-06	1e-06	1e-06	2e-06	3e-06	5e-06	7e-06	1e-05	1.5e-05	2.1e-05	3.1e-05	4.4e-05	6.3e-05	8.9e-05	0.000125	0.000177	0.000249	0.000349	0.000488	0.000682	0.00095	0.001321	0.001833	0.00254	0.003513	0.00485	0.006687	0.009205	0.012653
CASCAVEL	PR	-25.0022	-53.5019	0.427046	0	0	0	0	0	0	0	0	0	0	0	0	0	0	0	1e-06	1e-06	2e-06	2e-06	4e-06	5e-06	8e-06	1.2e-05	1.7e-05	2.5e-05	3.6e-05	5.2e-05	7.4e-05	0.000106	0.000151	0.000214	0.000303	0.000428	0.000602	0.000845	0.001183	0.001653	0.002305	0.003209	0.004459	0.006186	0.008566	0.011845	0.016353	0.022543
CABO FRIO	RJ	-22.9208	-42.0714	0.444444	0	0	0	0	0	0	0	0	0	0	0	0	0	0	0	1e-06	1e-06	2e-06	2e-06	4e-06	5e-06	8e-06	1.1e-05	1.7e-05	2.4e-05	3.5e-05	5e-05	7.2e-05	0.000103	0.000146	0.000207	0.000292	0.000412	0.000579	0.000811	0.001135	0.001584	0.002206	0.003067	0.004256	0.005896	0.008156	0.011262	0.015528	0.021378
CONFINS	MG	-19.6239	-43.9714	0.670391	0	0	0	1e-06	1e-06	3e-06	5e-06	9e-06	1.4e-05	2.2e-05	3.5e-05	5.2e-05	7.8e-05	0.000115	0.000167	0.00024	0.000344	0.000488	0.00069	0.00097	0.001357	0.001892	0.002629	0.003641	0.005028	0.006927	0.009522	0.013061	0.017881	0.024436	0.033341	0.045421	0.061789	0.083943	0.113894	0.15434	0.208897	0.282403	0.381315	0.514235	0.692585	0.931474	1.25079	1.67658	2.24263
CAMPO GRANDE	MS	-20.4694	-54.6703	0.508475	0	0	0	0	1e-06	1e-06	3e-06	4e-06	7e-06	1.2e-05	1.8e-05	2.7e-05	4e-05	5.8e-05	8.5e-05	0.000122	0.000173	0.000245	0.000346	0.000484	0.000675	0.000938	0.001298	0.001792	0.002467	0.003386	0.004639	0.006341	0.008651	0.011782	0.01602	0.021751	0.029488	0.039926	0.053989	0.072919	0.098371	0.132556	0.178419	0.239874	0.322119	0.432025	0.578657	0.773917	1.03336
CHAPECO	SC	-27.1339	-52.6619	0.478088	0	0	0	0	0	1e-06	1e-06	2e-06	4e-06	6e-06	9e-06	1.4e-05	2.1e-05	3.1e-05	4.5e-05	6.5e-05	9.2e-05	0.00013	0.000184	0.000257	0.000359	0.000499	0.000691	0.000955	0.001315	0.001805	0.002474	0.003383	0.004618	0.006291	0.008557	0.011622	0.015763	0.02135	0.028881	0.039021	0.052662	0.070993	0.095598	0.12859	0.172776	0.231878	0.310818	0.416088	0.556215
PARAUAPEBAS	PA	-6.11528	-50.0014	0.413793	0	0	0	0	0	0	0	0	0	0	0	0	0	0	1e-06	1e-06	2e-06	2e-06	4e-06	6e-06	8e-06	1.2e-05	1.8e-05	2.7e-05	3.8e-05	5.5e-05	8e-05	0.000114	0.000163	0.000231	0.000327	0.000462	0.000651	0.000914	0.001281	0.001792	0.0025	0.003481	0.004839	0.006713	0.009298	0.012858	0.017751	0.02447	0.033679
CALDAS NOVAS	GO	-17.7247	-48.61	0.470588	0	0	0	0	0	1e-06	2e-06	3e-06	4e-06	7e-06	1.1e-05	1.6e-05	2.4e-05	3.5e-05	5.1e-05	7.3e-05	0.000104	0.000147	0.000207	0.000289	0.000404	0.00056	0.000775	0.00107	0.001472	0.00202	0.002765	0.003778	0.005153	0.007014	0.009534	0.012938	0.017533	0.02373	0.032076	0.043306	0.058401	0.078671	0.105859	0.142287	0.191037	0.256192	0.343145	0.459	0.613072
CAMPOS DOS GOYTACAZES	RJ	-21.7011	-41.3078	0.382166	0	0	0	0	0	0	0	0	0	0	0	0	1e-06	1e-06	1e-06	2e-06	3e-06	4e-06	6e-06	8e-06	1.1e-05	1.6e-05	2.2e-05	3.1e-05	4.3e-05	6e-05	8.3e-05	0.000114	0.000158	0.000217	0.000299	0.00041	0.000562	0.000769	0.001051	0.001436	0.001958	0.002668	0.003631	0.004937	0.006706	0.0091	0.012337	0.016711	0.022613
CORUMBA	MS	-19.0119	-57.6714	0.433213	0	0	0	0	0	0	0	0	0	0	0	0	0	0	0	0	0	0	0	1e-06	1e-06	1e-06	2e-06	3e-06	5e-06	7e-06	1e-05	1.4e-05	2e-05	2.9e-05	4.1e-05	5.8e-05	8.3e-05	0.000117	0.000165	0.000233	0.000327	0.000459	0.000642	0.000898	0.001253	0.001745	0.002427	0.003371	0.004674
CURITIBA	PR	-25.5317	-49.1761	0.533333	0	0	0	0	1e-06	2e-06	4e-06	8e-06	1.2e-05	2e-05	3e-05	4.6e-05	6.8e-05	0.0001	0.000145	0.000209	0.000298	0.000423	0.000597	0.000837	0.00117	0.001628	0.002258	0.003121	0.004303	0.005918	0.008121	0.01112	0.015198	0.020735	0.028242	0.038409	0.052163	0.070746	0.095827	0.129642	0.175181	0.236439	0.318743	0.429179	0.577148	0.77508	1.03934	1.39134	1.85894
CAXIAS DO SUL	RS	-29.1956	-51.1897	0.437956	0	0	0	0	0	0	0	0	1e-06	1e-06	2e-06	2e-06	4e-06	5e-06	8e-06	1.1e-05	1.5e-05	2.2e-05	3.1e-05	4.3e-05	6e-05	8.4e-05	0.000116	0.000161	0.000222	0.000305	0.000418	0.000572	0.000781	0.001065	0.001451	0.001972	0.002678	0.003632	0.004919	0.006656	0.008995	0.012143	0.016377	0.022066	0.0297	0.039934	0.053638	0.071967	0.096445
VARZEA GRANDE	MT	-15.65	-56.1175	0.56872	0	0	0	0	1e-06	2e-06	3e-06	5e-06	8e-06	1.3e-05	2e-05	3e-05	4.5e-05	6.6e-05	9.6e-05	0.000138	0.000197	0.00028	0.000395	0.000554	0.000773	0.001076	0.001492	0.002063	0.002844	0.003911	0.005366	0.007347	0.010041	0.013698	0.018656	0.02537	0.034452	0.046723	0.063284	0.085613	0.115684	0.15614	0.210503	0.283467	0.381266	0.512161	0.687055	0.920283	1.23058
CRUZEIRO DO SUL	AC	-7.59944	-72.7694	0.38961	0	0	0	0	0	0	0	0	0	0	0	0	0	0	0	0	0	0	0	0	1e-06	1e-06	1e-06	2e-06	3e-06	4e-06	5e-06	8e-06	1.1e-05	1.6e-05	2.2e-05	3.1e-05	4.4e-05	6.2e-05	8.7e-05	0.000121	0.000169	0.000236	0.000327	0.000454	0.000629	0.00087	0.001201	0.001655	0.002278
BONITO	MS	-21.2472	-56.4525	0.41958	0	0	0	0	0	0	0	0	0	0	0	0	0	0	0	0	0	0	0	1e-06	1e-06	1e-06	2e-06	3e-06	5e-06	7e-06	1e-05	1.4e-05	2e-05	2.8e-05	4.1e-05	5.8e-05	8.2e-05	0.000117	0.000165	0.000233	0.000327	0.00046	0.000645	0.000902	0.00126	0.001757	0.002446	0.003401	0.004721
PRESIDENTE PRUDENTE	SP	-22.1783	-51.4189	0.434783	0	0	0	0	0	0	0	0	0	1e-06	1e-06	1e-06	2e-06	3e-06	4e-06	6e-06	8e-06	1.2e-05	1.7e-05	2.4e-05	3.3e-05	4.7e-05	6.5e-05	9.1e-05	0.000126	0.000174	0.00024	0.000331	0.000455	0.000624	0.000856	0.001171	0.0016	0.002183	0.002976	0.004052	0.005511	0.007487	0.010161	0.013778	0.018663	0.025256	0.034144	0.046112	0.062207
DOURADOS	MS	-22.2006	-54.9256	0.418118	0	0	0	0	0	0	0	0	0	0	0	0	0	0	0	0	0	0	0	1e-06	1e-06	1e-06	2e-06	3e-06	4e-06	6e-06	9e-06	1.3e-05	1.8e-05	2.6e-05	3.8e-05	5.3e-05	7.6e-05	0.000107	0.000152	0.000214	0.0003	0.000421	0.00059	0.000824	0.00115	0.001602	0.002228	0.003094	0.00429
MANAUS	AM	-3.04111	-60.0506	0.542986	0	0	0	0	1e-06	1e-06	2e-06	4e-06	7e-06	1.1e-05	1.6e-05	2.5e-05	3.7e-05	5.4e-05	7.9e-05	0.000113	0.000161	0.000228	0.000321	0.000451	0.000629	0.000874	0.001212	0.001674	0.002305	0.003168	0.004343	0.005941	0.008113	0.011059	0.01505	0.020451	0.02775	0.037605	0.050897	0.068804	0.092905	0.125307	0.168824	0.227202	0.305419	0.410077	0.549898	0.736371	0.984552
FEIRA DE SANTANA	BA	-12.2006	-38.9064	0.444444	0	0	0	0	0	0	0	0	0	0	0	0	0	0	0	0	1e-06	1e-06	1e-06	2e-06	3e-06	5e-06	7e-06	1e-05	1.4e-05	2.1e-05	3e-05	4.3e-05	6.1e-05	8.7e-05	0.000123	0.000174	0.000245	0.000345	0.000484	0.000676	0.000944	0.001315	0.001828	0.002538	0.003516	0.004863	0.006716	0.009261	0.012751
FOZ DO IGUACU	PR	-25.6003	-54.485	0.502092	0	0	0	0	1e-06	2e-06	4e-06	7e-06	1.1e-05	1.7e-05	2.7e-05	4e-05	5.9e-05	8.7e-05	0.000126	0.000182	0.000259	0.000367	0.000517	0.000725	0.001012	0.001407	0.001949	0.002693	0.003709	0.005096	0.006986	0.009556	0.013048	0.017783	0.024199	0.032879	0.044609	0.060444	0.081795	0.110555	0.149251	0.201259	0.271077	0.364687	0.490025	0.657583	0.881182	1.17894	1.57444
FLORIANAPOLIS	SC	-27.6703	-48.5525	0.483871	0	0	0	1e-06	1e-06	3e-06	5e-06	8e-06	1.4e-05	2.2e-05	3.3e-05	5e-05	7.5e-05	0.000109	0.000158	0.000227	0.000324	0.000459	0.000645	0.000904	0.00126	0.00175	0.002423	0.003343	0.004599	0.006313	0.008645	0.011813	0.016112	0.021937	0.029818	0.04047	0.054848	0.074235	0.100346	0.135473	0.182678	0.246041	0.330985	0.444711	0.596743	0.799638	1.06987	1.42895	1.90472
FERNANDO DE NORONHA	PE	-3.85472	-32.4283	0.366972	0	0	0	0	0	0	0	0	0	0	1e-06	1e-06	2e-06	3e-06	4e-06	5e-06	8e-06	1.1e-05	1.6e-05	2.3e-05	3.3e-05	4.7e-05	6.6e-05	9.3e-05	0.00013	0.000182	0.000253	0.000352	0.000488	0.000676	0.000933	0.001287	0.001772	0.002437	0.003345	0.004586	0.006279	0.008587	0.011731	0.016006	0.021817	0.029707	0.040407	0.054906	0.074531
FORTALEZA	CE	-3.77583	-38.5322	0.555556	0	3e-06	6e-06	1.1e-05	1.8e-05	2.7e-05	3.9e-05	5.5e-05	7.6e-05	0.000105	0.000144	0.000195	0.000264	0.000356	0.00048	0.000645	0.000865	0.00116	0.001553	0.002078	0.002779	0.003714	0.004962	0.006625	0.008843	0.011799	0.015738	0.020985	0.027974	0.03728	0.049668	0.066156	0.088092	0.117268	0.156062	0.207624	0.276124	0.367077	0.487767	0.647787	0.859741	1.14013	1.51046	1.99859	2.6403
RIO DE JANEIRO	RJ	-22.81	-43.2506	0.597015	0	1.8e-05	4.2e-05	7.3e-05	0.000114	0.000168	0.000238	0.00033	0.000451	0.00061	0.000817	0.001089	0.001446	0.001914	0.002528	0.003332	0.004387	0.00577	0.007584	0.009964	0.013085	0.01718	0.02255	0.029596	0.038839	0.050965	0.066874	0.087745	0.115126	0.151044	0.198159	0.25995	0.340974	0.447186	0.586363	0.768637	1.00718	1.31907	1.72634	2.25725	2.9478	3.84338	5.00045	6.48794	8.38791
GOIANIA	GO	-16.6325	-49.2211	0.542986	0	0	0	0	1e-06	2e-06	4e-06	7e-06	1.2e-05	1.8e-05	2.8e-05	4.3e-05	6.3e-05	9.3e-05	0.000135	0.000194	0.000276	0.000391	0.000551	0.000773	0.001079	0.001501	0.002079	0.002872	0.003957	0.005437	0.007455	0.010199	0.013928	0.018986	0.025839	0.035111	0.047644	0.064564	0.087382	0.11812	0.159482	0.215076	0.289711	0.389779	0.523758	0.702849	0.941795	1.2599	1.68226
GUARULHOS	SP	-23.4356	-46.4731	0.645161	0	5.9e-05	0.000137	0.000238	0.00037	0.000543	0.000767	0.00106	0.001443	0.001942	0.002593	0.003442	0.004551	0.005997	0.007886	0.01035	0.013566	0.017764	0.023243	0.030396	0.039732	0.05192	0.06783	0.088598	0.115708	0.151093	0.197276	0.257542	0.336174	0.438737	0.572469	0.746755	0.973742	1.2691	1.65299	2.15117	2.79637	3.62978	4.70261	6.07748	7.82928	10.0448	12.8201	16.2547	20.4403
GOVERNADOR VALADARES	MG	-18.8969	-41.9861	0.415225	0	0	0	0	0	0	0	0	0	0	0	0	0	0	0	0	1e-06	1e-06	2e-06	2e-06	4e-06	5e-06	8e-06	1.1e-05	1.6e-05	2.4e-05	3.4e-05	4.9e-05	6.9e-05	9.9e-05	0.00014	0.000197	0.000278	0.000391	0.000548	0.000766	0.001069	0.001489	0.002069	0.002872	0.003978	0.005503	0.007598	0.010476	0.014422
ALTAMIRA	PA	-3.25083	-52.2522	0.446097	0	0	0	0	0	0	0	0	0	0	0	1e-06	1e-06	1e-06	2e-06	3e-06	4e-06	6e-06	9e-06	1.3e-05	1.8e-05	2.5e-05	3.5e-05	4.9e-05	6.8e-05	9.5e-05	0.000131	0.000181	0.00025	0.000343	0.000471	0.000646	0.000884	0.001209	0.00165	0.00225	0.003064	0.004168	0.005664	0.007688	0.010425	0.014121	0.019107	0.025826	0.034868
ITAITUBA	PA	-4.24222	-56.0008	0.369231	0	0	0	0	0	0	0	0	0	0	0	0	0	0	0	0	0	0	0	1e-06	1e-06	1e-06	2e-06	3e-06	4e-06	6e-06	9e-06	1.2e-05	1.8e-05	2.5e-05	3.5e-05	5e-05	7e-05	9.8e-05	0.000138	0.000192	0.000268	0.000372	0.000517	0.000716	0.00099	0.001367	0.001885	0.002595	0.003568
ILHEUS	BA	-14.815	-39.0333	0.46332	0	0	0	0	0	0	1e-06	1e-06	2e-06	3e-06	4e-06	7e-06	1e-05	1.5e-05	2.2e-05	3.1e-05	4.5e-05	6.4e-05	9e-05	0.000127	0.000178	0.000248	0.000345	0.000479	0.000663	0.000915	0.001261	0.001733	0.002378	0.003257	0.004453	0.00608	0.00829	0.011288	0.015352	0.020854	0.028297	0.038357	0.051938	0.070257	0.094942	0.128169	0.172842	0.232829	0.313266
SANTANA DO PARAISO	MG	-19.4706	-42.4881	0.409556	0	0	0	0	0	0	0	0	0	0	0	0	0	0	0	1e-06	1e-06	1e-06	2e-06	3e-06	5e-06	7e-06	1e-05	1.4e-05	2.1e-05	3e-05	4.3e-05	6.2e-05	8.8e-05	0.000125	0.000177	0.00025	0.000352	0.000495	0.000693	0.000969	0.001353	0.001884	0.002619	0.003635	0.005036	0.006964	0.009617	0.013259	0.018252
IMPERATRIZ	MA	-5.53056	-47.4583	0.456274	0	0	0	0	0	0	1e-06	1e-06	2e-06	3e-06	4e-06	7e-06	1e-05	1.4e-05	2.1e-05	3e-05	4.2e-05	6e-05	8.5e-05	0.000119	0.000166	0.00023	0.000319	0.000441	0.000607	0.000834	0.001144	0.001564	0.002136	0.00291	0.00396	0.00538	0.0073	0.00989	0.013384	0.01809	0.024424	0.032939	0.044375	0.059718	0.08028	0.107804	0.144601	0.193723	0.259196
JAGUARUNA	SC	-28.6753	-49.0603	0.428571	0	0	0	0	0	0	0	0	0	0	0	0	0	0	0	0	0	1e-06	1e-06	1e-06	2e-06	3e-06	5e-06	7e-06	1e-05	1.4e-05	2.1e-05	3e-05	4.3e-05	6.2e-05	8.8e-05	0.000126	0.000179	0.000253	0.000358	0.000505	0.000711	0.000999	0.0014	0.001958	0.002734	0.003812	0.005306	0.007375	0.010233
CRUZ	CE	-2.90667	-40.3581	0.461538	0	0	0	0	0	0	1e-06	1e-06	2e-06	4e-06	6e-06	9e-06	1.3e-05	1.9e-05	2.7e-05	3.9e-05	5.6e-05	7.9e-05	0.000112	0.000156	0.000218	0.000303	0.00042	0.00058	0.000798	0.001096	0.001502	0.002053	0.002802	0.003817	0.005192	0.00705	0.00956	0.012948	0.017513	0.023661	0.03193	0.043042	0.057959	0.077962	0.104757	0.140605	0.188503	0.252409	0.337532
JI PARANA	RO	-10.8706	-61.8467	0.363636	0	0	0	0	0	0	0	0	0	0	0	0	0	0	0	0	0	1e-06	1e-06	1e-06	2e-06	3e-06	4e-06	6e-06	9e-06	1.3e-05	1.8e-05	2.6e-05	3.7e-05	5.2e-05	7.4e-05	0.000104	0.000147	0.000206	0.000288	0.000403	0.000562	0.000781	0.001084	0.001503	0.00208	0.002873	0.003962	0.005457	0.007504
JOAO PESSOA	PB	-7.14833	-34.9503	0.472441	0	0	0	0	1e-06	2e-06	3e-06	5e-06	9e-06	1.4e-05	2.1e-05	3.2e-05	4.8e-05	7e-05	0.000102	0.000146	0.000208	0.000295	0.000416	0.000582	0.000812	0.001129	0.001563	0.002158	0.002971	0.00408	0.005591	0.007644	0.010432	0.014211	0.019328	0.026248	0.035596	0.048207	0.065206	0.088092	0.118872	0.160226	0.215722	0.290108	0.389686	0.522793	0.700424	0.937017	1.25142
JUAZEIRO DO NORTE	CE	-7.21833	-39.2717	0.46875	0	0	0	0	0	1e-06	2e-06	3e-06	5e-06	8e-06	1.2e-05	1.8e-05	2.6e-05	3.8e-05	5.5e-05	7.9e-05	0.000113	0.00016	0.000225	0.000315	0.000439	0.00061	0.000844	0.001165	0.001604	0.002201	0.003014	0.004119	0.005619	0.007651	0.0104	0.014117	0.019135	0.025901	0.035017	0.047284	0.063775	0.085922	0.115631	0.155442	0.208724	0.279943	0.374996	0.501652	0.670094
JOINVILLE	SC	-26.2231	-48.7978	0.48583	0	0	0	0	0	0	0	0	1e-06	1e-06	2e-06	3e-06	4e-06	6e-06	8e-06	1.2e-05	1.7e-05	2.5e-05	3.5e-05	4.9e-05	6.8e-05	9.5e-05	0.000132	0.000183	0.000253	0.000349	0.00048	0.000659	0.000902	0.001233	0.001683	0.002294	0.003122	0.004245	0.005763	0.007817	0.01059	0.014332	0.019378	0.026174	0.035319	0.047612	0.064119	0.086257	0.115909
CAMPINA GRANDE	PB	-7.26917	-35.895	0.434783	0	0	0	0	0	1e-06	1e-06	2e-06	3e-06	5e-06	7e-06	1.1e-05	1.6e-05	2.4e-05	3.5e-05	5e-05	7.1e-05	0.0001	0.000141	0.000197	0.000275	0.000382	0.000529	0.000729	0.001004	0.001378	0.001886	0.002578	0.003516	0.004787	0.006508	0.008833	0.011971	0.016204	0.021907	0.029581	0.039899	0.053756	0.07235	0.097273	0.130643	0.175272	0.234881	0.314388	0.420264
CAMPINAS	SP	-23.0069	-47.1344	0.701754	0	0	0	0	0	1e-06	1e-06	2e-06	3e-06	5e-06	8e-06	1.2e-05	1.9e-05	2.8e-05	4.1e-05	6e-05	8.8e-05	0.000126	0.000181	0.000257	0.000365	0.000516	0.000727	0.001019	0.001426	0.00199	0.002769	0.003844	0.005327	0.007366	0.010167	0.014011	0.019276	0.026481	0.036328	0.049769	0.068097	0.093059	0.127018	0.173167	0.235807	0.320724	0.435689	0.591101	0.800832
LENAIS	BA	-12.4822	-41.2769	0.356083	0	0	0	0	0	0	0	0	0	0	0	1e-06	1e-06	1e-06	2e-06	3e-06	4e-06	6e-06	9e-06	1.2e-05	1.7e-05	2.5e-05	3.4e-05	4.8e-05	6.6e-05	9.2e-05	0.000127	0.000175	0.000241	0.000331	0.000454	0.000622	0.000851	0.001163	0.001586	0.002161	0.002942	0.003999	0.005432	0.007371	0.009992	0.013533	0.018313	0.02476	0.033446
LAGES	SC	-27.7822	-50.2817	0.413793	0	0	0	0	0	0	0	0	0	0	0	0	0	0	0	0	0	0	0	1e-06	1e-06	1e-06	2e-06	3e-06	5e-06	7e-06	1e-05	1.5e-05	2.1e-05	3e-05	4.3e-05	6.1e-05	8.7e-05	0.000124	0.000175	0.000247	0.000347	0.000488	0.000684	0.000957	0.001337	0.001864	0.002595	0.003608	0.005008
LONDRINA	PR	-23.3303	-51.1367	0.497925	0	0	0	0	0	1e-06	2e-06	3e-06	5e-06	8e-06	1.2e-05	1.8e-05	2.7e-05	4e-05	5.8e-05	8.3e-05	0.000118	0.000167	0.000236	0.00033	0.00046	0.000639	0.000885	0.001221	0.00168	0.002306	0.003159	0.004317	0.005888	0.008017	0.010899	0.014794	0.020053	0.027145	0.036699	0.049556	0.066841	0.090054	0.121195	0.162922	0.218768	0.29341	0.393024	0.52574	0.702211
MARABA	PA	-5.36806	-49.1381	0.422535	0	0	0	0	0	0	0	0	0	0	0	0	0	1e-06	1e-06	1e-06	2e-06	3e-06	5e-06	7e-06	1e-05	1.5e-05	2.2e-05	3.3e-05	4.7e-05	6.8e-05	9.7e-05	0.000139	0.000198	0.000281	0.000397	0.000561	0.000789	0.001108	0.001551	0.002168	0.003023	0.004208	0.005847	0.00811	0.01123	0.015526	0.021432	0.02954	0.040655
MARINGA	PR	-23.4794	-52.0122	0.489796	0	0	0	0	0	1e-06	1e-06	2e-06	3e-06	4e-06	6e-06	1e-05	1.5e-05	2.1e-05	3.1e-05	4.4e-05	6.3e-05	9e-05	0.000127	0.000178	0.000248	0.000345	0.000478	0.000661	0.000911	0.001252	0.001717	0.00235	0.00321	0.004378	0.005961	0.008104	0.011002	0.014917	0.020199	0.02732	0.03691	0.049812	0.067151	0.090429	0.121646	0.163459	0.21939	0.294096	0.393714
MONTES CLAROS	MG	-16.7061	-43.8219	0.45977	0	0	0	0	0	0	0	0	0	0	1e-06	1e-06	1e-06	2e-06	3e-06	4e-06	6e-06	8e-06	1.2e-05	1.7e-05	2.4e-05	3.4e-05	4.8e-05	6.7e-05	9.4e-05	0.000132	0.000184	0.000256	0.000356	0.000494	0.000683	0.000944	0.001303	0.001796	0.00247	0.003393	0.004656	0.00638	0.008731	0.011936	0.016297	0.022227	0.03028	0.041202	0.055998
MARILIA	SP	-22.1956	-49.9269	0.415225	0	0	0	0	0	0	0	0	0	0	0	0	0	0	0	0	0	0	0	1e-06	1e-06	1e-06	2e-06	3e-06	4e-06	6e-06	8e-06	1.2e-05	1.8e-05	2.5e-05	3.6e-05	5.1e-05	7.3e-05	0.000103	0.000146	0.000205	0.000289	0.000406	0.000569	0.000796	0.001112	0.001551	0.002159	0.003001	0.004166
MANAUS	AM	-3.14611	-59.9864	0.387097	0	0	0	0	0	0	0	0	0	0	0	0	0	0	0	0	0	0	0	0	0	0	1e-06	1e-06	1e-06	2e-06	2e-06	3e-06	5e-06	7e-06	9e-06	1.3e-05	1.9e-05	2.6e-05	3.7e-05	5.1e-05	7.2e-05	0.0001	0.00014	0.000194	0.000269	0.000372	0.000515	0.00071	0.000979
MACEIO	AL	-9.51722	-35.7836	0.510638	0	0	0	0	1e-06	2e-06	4e-06	6e-06	1e-05	1.6e-05	2.5e-05	3.8e-05	5.6e-05	8.2e-05	0.000119	0.000171	0.000244	0.000346	0.000487	0.000682	0.000953	0.001324	0.001835	0.002535	0.003491	0.004797	0.006576	0.008996	0.012284	0.016743	0.022784	0.030958	0.042005	0.056918	0.077028	0.104117	0.140568	0.189563	0.255342	0.343546	0.461656	0.619574	0.83034	1.11106	1.48402
MACAPA	AP	0.0508333	-51.0703	0.441176	0	0	0	0	0	0	0	0	0	1e-06	1e-06	1e-06	2e-06	3e-06	5e-06	7e-06	1e-05	1.5e-05	2.1e-05	3.1e-05	4.3e-05	6.1e-05	8.6e-05	0.000121	0.000169	0.000236	0.000328	0.000455	0.000631	0.000872	0.001204	0.001659	0.002283	0.003137	0.004303	0.005896	0.008069	0.011028	0.015056	0.020533	0.027969	0.038058	0.051729	0.070231	0.095241
MOSSORO	RN	-5.19583	-37.3617	0.365854	0	0	0	0	0	0	0	0	0	0	0	0	0	1e-06	1e-06	1e-06	2e-06	3e-06	4e-06	6e-06	8e-06	1.2e-05	1.6e-05	2.3e-05	3.2e-05	4.4e-05	6.1e-05	8.5e-05	0.000118	0.000163	0.000224	0.000308	0.000424	0.000581	0.000796	0.00109	0.001489	0.002033	0.002772	0.003776	0.005137	0.006983	0.009484	0.012866	0.017439
NAVEGANTES	SC	-26.8786	-48.6508	0.474308	0	0	0	0	1e-06	2e-06	3e-06	5e-06	8e-06	1.2e-05	1.9e-05	2.8e-05	4.2e-05	6.2e-05	8.9e-05	0.000128	0.000183	0.000259	0.000364	0.00051	0.000711	0.000988	0.001367	0.001885	0.002594	0.00356	0.004874	0.00666	0.009082	0.012364	0.016804	0.022805	0.030904	0.041825	0.056533	0.076321	0.102916	0.138622	0.186504	0.250642	0.336441	0.451055	0.603913	0.807393	1.07767
SANTO ANGELO	RS	-28.2817	-54.1683	0.371517	0	0	0	0	0	0	0	0	0	0	0	0	0	0	0	0	1e-06	1e-06	2e-06	3e-06	4e-06	6e-06	8e-06	1.2e-05	1.7e-05	2.5e-05	3.6e-05	5.1e-05	7.3e-05	0.000103	0.000146	0.000206	0.00029	0.000406	0.000569	0.000794	0.001107	0.00154	0.002137	0.002962	0.004097	0.005659	0.007803	0.010743	0.014768
PORTO ALEGRE	RS	-29.9939	-51.1711	0.571429	0	0	0	1e-06	1e-06	3e-06	5e-06	9e-06	1.4e-05	2.3e-05	3.5e-05	5.3e-05	7.8e-05	0.000114	0.000166	0.000239	0.000341	0.000484	0.000682	0.000956	0.001335	0.001858	0.002576	0.003561	0.004908	0.006748	0.009256	0.012671	0.017313	0.023612	0.032152	0.043714	0.059349	0.080468	0.108963	0.147366	0.199065	0.268582	0.361943	0.487156	0.654836	0.878999	1.17806	1.57608	2.10425
PARNAIBA	PI	-2.89389	-41.7303	0.415225	0	0	0	0	0	0	0	0	0	0	0	0	0	0	0	0	0	0	0	0	1e-06	1e-06	2e-06	2e-06	3e-06	5e-06	7e-06	1e-05	1.5e-05	2.1e-05	3e-05	4.3e-05	6.2e-05	8.7e-05	0.000123	0.000174	0.000245	0.000344	0.000483	0.000676	0.000944	0.001316	0.001832	0.002547	0.003535
POCOS DE CALDAS	MG	-21.8378	-46.5661	0.351906	0	0	0	0	0	0	0	0	0	0	0	0	0	0	0	0	0	0	0	0	0	0	0	0	0	0	0	0	0	0	1e-06	1e-06	1e-06	2e-06	3e-06	4e-06	6e-06	8e-06	1.2e-05	1.7e-05	2.3e-05	3.3e-05	4.6e-05	6.5e-05	9e-05
PASSO FUNDO	RS	-28.2453	-52.3286	0.422535	0	0	0	0	0	0	0	0	0	0	0	0	0	0	0	0	1e-06	1e-06	1e-06	2e-06	3e-06	4e-06	6e-06	9e-06	1.3e-05	1.9e-05	2.7e-05	3.8e-05	5.5e-05	7.8e-05	0.00011	0.000156	0.00022	0.00031	0.000436	0.000611	0.000854	0.001191	0.001659	0.002306	0.003201	0.004435	0.006136	0.008476	0.011691
PALMAS	TO	-10.29	-48.3578	0.466926	0	0	0	0	0	0	0	0	0	0	0	0	0	1e-06	1e-06	2e-06	3e-06	4e-06	7e-06	1e-05	1.5e-05	2.2e-05	3.2e-05	4.6e-05	6.7e-05	9.7e-05	0.00014	0.000201	0.000287	0.000408	0.000579	0.000819	0.001156	0.001626	0.002282	0.003196	0.004465	0.006228	0.008669	0.012045	0.016707	0.023137	0.031989	0.04416	0.060868
PELOTAS	RS	-31.7161	-52.3311	0.365854	0	0	0	0	0	0	0	0	0	0	0	0	0	0	0	0	1e-06	1e-06	1e-06	2e-06	3e-06	5e-06	7e-06	1e-05	1.5e-05	2.2e-05	3.1e-05	4.5e-05	6.4e-05	9e-05	0.000128	0.00018	0.000254	0.000356	0.000498	0.000695	0.000969	0.001348	0.001871	0.002592	0.003586	0.004953	0.00683	0.009403	0.012927
PETROLINA	PE	-9.3675	-40.5636	0.456274	0	0	0	0	0	1e-06	1e-06	2e-06	3e-06	4e-06	6e-06	1e-05	1.4e-05	2.1e-05	3.1e-05	4.4e-05	6.3e-05	8.9e-05	0.000126	0.000176	0.000246	0.000342	0.000474	0.000655	0.000902	0.00124	0.0017	0.002327	0.003178	0.004333	0.005898	0.008016	0.010881	0.014749	0.019967	0.027	0.036468	0.049203	0.066315	0.089283	0.120077	0.161316	0.216473	0.290139	0.388365
PORTO SEGURO	BA	-16.4381	-39.0778	0.533333	0	0	0	0	1e-06	2e-06	4e-06	6e-06	1e-05	1.6e-05	2.5e-05	3.8e-05	5.6e-05	8.2e-05	0.00012	0.000172	0.000246	0.000349	0.000492	0.000691	0.000966	0.001344	0.001865	0.00258	0.003558	0.004895	0.00672	0.009205	0.012586	0.017177	0.023406	0.031846	0.043267	0.058706	0.079554	0.107674	0.145563	0.196558	0.26511	0.357149	0.480552	0.645747	0.866488	1.16083	1.5523
PORTO VELHO	RO	-8.71361	-63.9028	0.506329	0	0	0	0	0	1e-06	1e-06	2e-06	3e-06	5e-06	8e-06	1.2e-05	1.8e-05	2.6e-05	3.8e-05	5.5e-05	7.8e-05	0.00011	0.000156	0.000218	0.000305	0.000424	0.000588	0.000813	0.001121	0.001541	0.002113	0.002893	0.003952	0.00539	0.00734	0.009979	0.013548	0.01837	0.024877	0.033648	0.04546	0.06135	0.082706	0.111374	0.149815	0.201297	0.270149	0.362089	0.484646
VITORIA DA CONQUISTA	BA	-14.8636	-40.8631	0.437956	0	0	0	0	0	1e-06	1e-06	2e-06	3e-06	4e-06	6e-06	1e-05	1.5e-05	2.1e-05	3.1e-05	4.4e-05	6.4e-05	9e-05	0.000127	0.000178	0.000249	0.000346	0.00048	0.000664	0.000915	0.001259	0.001727	0.002365	0.003232	0.004409	0.006005	0.008166	0.011089	0.01504	0.020372	0.027562	0.037248	0.050282	0.067806	0.09134	0.122911	0.165217	0.221831	0.297489	0.398432
RIO BRANCO	AC	-9.86889	-67.8981	0.428571	0	0	0	0	0	0	0	0	0	0	0	0	0	0	1e-06	1e-06	2e-06	2e-06	4e-06	6e-06	8e-06	1.2e-05	1.8e-05	2.6e-05	3.8e-05	5.5e-05	7.9e-05	0.000114	0.000162	0.00023	0.000326	0.000461	0.00065	0.000914	0.001281	0.001793	0.002503	0.003488	0.004851	0.006735	0.009335	0.012917	0.017844	0.024614	0.0339
RONDONOPOLIS	MT	-16.5853	-54.7242	0.377358	0	0	0	0	0	0	0	0	0	0	0	0	0	0	0	0	1e-06	1e-06	1e-06	2e-06	3e-06	4e-06	6e-06	8e-06	1.2e-05	1.8e-05	2.5e-05	3.6e-05	5.2e-05	7.4e-05	0.000104	0.000147	0.000207	0.000291	0.000408	0.00057	0.000795	0.001106	0.001537	0.002131	0.00295	0.004078	0.005628	0.007755	0.010671
RECIFE	PE	-8.12639	-34.9228	0.574163	0	3e-06	6e-06	1.2e-05	1.8e-05	2.8e-05	4.1e-05	5.8e-05	8.1e-05	0.000112	0.000155	0.000212	0.00029	0.000394	0.000534	0.000722	0.000975	0.001315	0.001771	0.002382	0.003202	0.0043	0.005771	0.00774	0.010374	0.013897	0.018606	0.024897	0.033299	0.044515	0.059483	0.079449	0.106069	0.141544	0.188799	0.251709	0.335407	0.446685	0.594503	0.790655	1.05062	1.3946	1.84884	2.44716	3.23272
RIO DE JANEIRO	RJ	-22.91	-43.1625	0.519481	0	0	0	0	1e-06	1e-06	3e-06	5e-06	8e-06	1.2e-05	1.9e-05	2.8e-05	4.2e-05	6.2e-05	9e-05	0.00013	0.000186	0.000265	0.000374	0.000526	0.000736	0.001027	0.001427	0.001977	0.002731	0.003763	0.005174	0.007099	0.009722	0.013289	0.018137	0.024716	0.033633	0.045707	0.062036	0.084097	0.11387	0.154006	0.208054	0.280745	0.378384	0.50934	0.684693	0.919039	1.23151
RIBEIRAO PRETO	SP	-21.1364	-47.7767	0.533333	0	0	0	0	0	1e-06	1e-06	2e-06	3e-06	5e-06	8e-06	1.3e-05	1.9e-05	2.8e-05	4.1e-05	5.9e-05	8.4e-05	0.000119	0.000169	0.000237	0.000332	0.000464	0.000645	0.000894	0.001236	0.001704	0.002345	0.003219	0.004411	0.006034	0.008241	0.011237	0.015302	0.020809	0.028263	0.038342	0.051956	0.070326	0.09509	0.128435	0.173287	0.233542	0.314383	0.422682	0.567518
SAO GONCALO DO AMARANTE	RN	-5.76889	-35.3664	0.493827	0	0	0	0	1e-06	2e-06	4e-06	6e-06	1.1e-05	1.7e-05	2.6e-05	3.9e-05	5.7e-05	8.4e-05	0.000122	0.000175	0.00025	0.000354	0.000498	0.000698	0.000974	0.001354	0.001876	0.00259	0.003567	0.004901	0.006717	0.009187	0.012541	0.017089	0.02325	0.031584	0.042844	0.058041	0.07853	0.106122	0.14324	0.193117	0.260063	0.349806	0.469945	0.630526	0.844782	1.13006	1.50894
SAO JOSE DOS CAMPOS	SP	-23.2289	-45.8711	0.430108	0	0	0	0	0	0	0	0	0	0	0	0	0	0	1e-06	1e-06	1e-06	2e-06	3e-06	4e-06	6e-06	8e-06	1.1e-05	1.5e-05	2.1e-05	3e-05	4.1e-05	5.7e-05	7.8e-05	0.000108	0.000148	0.000204	0.000279	0.000382	0.000522	0.000713	0.000973	0.001326	0.001804	0.002453	0.003331	0.004521	0.006129	0.008301	0.011233
SAO LUIS	MA	-2.58694	-44.2361	0.48	0	0	0	0	1e-06	1e-06	2e-06	4e-06	6e-06	9e-06	1.5e-05	2.2e-05	3.3e-05	4.8e-05	6.9e-05	0.0001	0.000142	0.000202	0.000285	0.000399	0.000558	0.000776	0.001076	0.001487	0.00205	0.002819	0.003868	0.005295	0.007235	0.009869	0.01344	0.018275	0.024814	0.03365	0.045574	0.06165	0.083303	0.112435	0.151589	0.204154	0.274641	0.369038	0.495268	0.663787	0.888326
SANTA MARIA	RS	-29.7108	-53.6922	0.365854	0	0	0	0	0	0	0	0	0	0	0	0	0	0	0	0	1e-06	1e-06	2e-06	3e-06	4e-06	6e-06	8e-06	1.2e-05	1.7e-05	2.5e-05	3.6e-05	5.1e-05	7.3e-05	0.000103	0.000146	0.000206	0.00029	0.000406	0.000569	0.000794	0.001107	0.00154	0.002137	0.002962	0.004097	0.005659	0.007803	0.010743	0.014768
SANTAREM	PA	-2.42472	-54.7858	0.458015	0	0	0	0	0	0	0	0	0	0	1e-06	1e-06	1e-06	2e-06	3e-06	4e-06	6e-06	9e-06	1.3e-05	1.9e-05	2.7e-05	3.8e-05	5.4e-05	7.6e-05	0.000107	0.000151	0.000211	0.000296	0.000412	0.000574	0.000797	0.001105	0.001529	0.002113	0.002915	0.004015	0.005523	0.007586	0.010407	0.014259	0.019512	0.026669	0.036407	0.049643	0.067608
SORRISO	MT	-12.4728	-55.6689	0.408163	0	0	0	0	0	0	0	0	0	0	0	0	0	0	0	0	0	1e-06	1e-06	2e-06	2e-06	3e-06	5e-06	7e-06	1.1e-05	1.5e-05	2.2e-05	3.1e-05	4.5e-05	6.4e-05	9e-05	0.000127	0.000178	0.00025	0.00035	0.000489	0.000682	0.000948	0.001317	0.001825	0.002525	0.003488	0.004811	0.006626	0.009112
SAO PAULO	SP	-23.6261	-46.6564	0.57971	0	0	0	0	0	1e-06	1e-06	2e-06	4e-06	6e-06	9e-06	1.4e-05	2.1e-05	3.1e-05	4.6e-05	6.8e-05	9.9e-05	0.000142	0.000205	0.000292	0.000416	0.000589	0.000832	0.00117	0.00164	0.002293	0.003198	0.00445	0.006178	0.00856	0.011839	0.016344	0.022527	0.031002	0.042602	0.058461	0.080118	0.109657	0.1499	0.204663	0.279092	0.380119	0.517054	0.702368	0.952697
SAO JOSE RIO PRETO	SP	-20.8161	-49.4047	0.508475	0	0	0	0	0	0	1e-06	1e-06	2e-06	3e-06	4e-06	7e-06	1e-05	1.5e-05	2.1e-05	3.1e-05	4.4e-05	6.2e-05	8.8e-05	0.000124	0.000173	0.000241	0.000335	0.000464	0.000641	0.000883	0.001213	0.001664	0.002277	0.003112	0.004245	0.005783	0.007866	0.010687	0.0145	0.019652	0.026604	0.035976	0.048598	0.065582	0.088407	0.119049	0.160135	0.215147	0.288694
SALVADOR	BA	-12.9086	-38.3225	0.550459	0	4e-06	9e-06	1.6e-05	2.6e-05	3.8e-05	5.5e-05	7.8e-05	0.000108	0.000148	0.000202	0.000274	0.000369	0.000497	0.000667	0.000893	0.001195	0.001597	0.002132	0.002844	0.003793	0.005055	0.006734	0.008967	0.011938	0.015888	0.021138	0.028117	0.03739	0.049711	0.066075	0.087806	0.116656	0.154944	0.205742	0.27311	0.362411	0.480714	0.637325	0.844458	1.11809	1.47904	1.95426	2.57839	3.3955
ORIXIMIN	PA	-1.48444	-56.3992	0.357143	0	0	0	0	0	0	0	0	0	0	0	0	0	0	0	0	0	0	0	1e-06	1e-06	1e-06	2e-06	3e-06	4e-06	5e-06	8e-06	1.1e-05	1.6e-05	2.2e-05	3.2e-05	4.5e-05	6.3e-05	8.8e-05	0.000123	0.000172	0.00024	0.000334	0.000464	0.000643	0.000889	0.001229	0.001696	0.002336	0.003214
UNA ñ COMANDATUBA (PRIVADO)	BA	-15.3533	-38.9972	0.454545	0	0	0	0	0	0	0	1e-06	1e-06	2e-06	2e-06	4e-06	6e-06	8e-06	1.2e-05	1.7e-05	2.4e-05	3.4e-05	4.8e-05	6.7e-05	9.3e-05	0.00013	0.000179	0.000247	0.00034	0.000467	0.00064	0.000874	0.001192	0.001623	0.002206	0.002994	0.004058	0.005493	0.007426	0.010027	0.013524	0.018221	0.024524	0.032972	0.044284	0.059414	0.079624	0.106585	0.142498
TERESINA	PI	-5.06056	-42.8244	0.465116	0	0	0	0	1e-06	1e-06	2e-06	3e-06	6e-06	9e-06	1.3e-05	2e-05	3e-05	4.4e-05	6.4e-05	9.2e-05	0.000131	0.000185	0.000261	0.000365	0.00051	0.000709	0.000982	0.001357	0.001869	0.002568	0.003519	0.004814	0.006573	0.008959	0.01219	0.016563	0.022471	0.030448	0.041204	0.055693	0.075191	0.101402	0.1366	0.183813	0.247067	0.331698	0.444764	0.595566	0.796306
TEFA	AM	-3.38028	-64.7253	0.402685	0	0	0	0	0	0	0	0	0	0	0	0	0	0	0	0	1e-06	1e-06	1e-06	2e-06	3e-06	4e-06	6e-06	9e-06	1.3e-05	1.9e-05	2.8e-05	3.9e-05	5.6e-05	8e-05	0.000113	0.000159	0.000223	0.000313	0.000438	0.000612	0.000852	0.001185	0.001644	0.002278	0.00315	0.00435	0.005997	0.008255	0.011347
TRES LAGOAS	MS	-20.7514	-51.6803	0.430108	0	0	0	0	0	0	0	0	0	1e-06	1e-06	1e-06	2e-06	3e-06	4e-06	5e-06	8e-06	1.1e-05	1.5e-05	2.2e-05	3e-05	4.2e-05	5.8e-05	8.1e-05	0.000111	0.000153	0.00021	0.000287	0.000392	0.000535	0.000728	0.00099	0.001345	0.001824	0.002472	0.003344	0.004521	0.006104	0.008234	0.011097	0.014939	0.020091	0.026992	0.036225	0.04856
TABATINGA	AM	-4.25056	-69.9378	0.368098	0	0	0	0	0	0	0	0	0	0	0	0	0	0	0	0	0	0	1e-06	1e-06	2e-06	2e-06	3e-06	5e-06	7e-06	1e-05	1.4e-05	2e-05	2.9e-05	4.1e-05	5.8e-05	8.2e-05	0.000115	0.000161	0.000225	0.000314	0.000438	0.000609	0.000845	0.001171	0.001619	0.002236	0.003082	0.004243	0.005832
SAO GABRIEL DA CACHOEIRA	AM	-0.148056	-66.9858	0.352941	0	0	0	0	0	0	0	0	0	0	0	0	0	0	0	0	0	0	0	1e-06	1e-06	1e-06	2e-06	3e-06	4e-06	6e-06	8e-06	1.2e-05	1.7e-05	2.4e-05	3.4e-05	4.8e-05	6.8e-05	9.6e-05	0.000134	0.000187	0.00026	0.000361	0.000501	0.000695	0.00096	0.001326	0.001828	0.002517	0.003459
PAULO AFONSO	BA	-9.40111	-38.2511	0.377358	0	0	0	0	0	0	0	0	0	0	0	1e-06	1e-06	2e-06	2e-06	3e-06	5e-06	7e-06	1e-05	1.4e-05	1.9e-05	2.7e-05	3.8e-05	5.3e-05	7.3e-05	0.000102	0.000141	0.000194	0.000267	0.000367	0.000504	0.000691	0.000946	0.001292	0.001763	0.002404	0.003273	0.004451	0.006048	0.00821	0.011133	0.015085	0.02042	0.027618	0.03732
URUGUAIANA	RS	-29.7833	-57.0369	0.366972	0	0	0	0	0	0	0	0	0	0	0	0	0	0	0	1e-06	1e-06	1e-06	2e-06	3e-06	4e-06	6e-06	9e-06	1.3e-05	1.9e-05	2.8e-05	4e-05	5.7e-05	8.1e-05	0.000115	0.000163	0.00023	0.000324	0.000454	0.000635	0.000887	0.001236	0.001719	0.002387	0.003307	0.004574	0.006316	0.008709	0.011988	0.016478
UBERLANDIA	MG	-18.8836	-48.2253	0.502092	0	0	0	0	1e-06	1e-06	2e-06	4e-06	6e-06	9e-06	1.4e-05	2.1e-05	3.2e-05	4.7e-05	6.8e-05	9.7e-05	0.000138	0.000196	0.000276	0.000387	0.00054	0.000751	0.00104	0.001437	0.001979	0.002719	0.003727	0.005099	0.006961	0.009487	0.01291	0.01754	0.023798	0.032245	0.043636	0.05898	0.079629	0.107386	0.144659	0.19465	0.26162	0.35121	0.47088	0.630448	0.842786
UBERABA	MG	-19.7647	-47.9661	0.45283	0	0	0	0	0	0	0	0	0	0	0	1e-06	1e-06	2e-06	2e-06	3e-06	5e-06	7e-06	1e-05	1.4e-05	1.9e-05	2.7e-05	3.9e-05	5.4e-05	7.6e-05	0.000105	0.000146	0.000203	0.00028	0.000387	0.000534	0.000735	0.00101	0.001386	0.0019	0.0026	0.003555	0.004855	0.006622	0.009024	0.012282	0.0167	0.022681	0.030772	0.041701
VARGINHA	MG	-21.5889	-45.4733	0.415225	0	0	0	0	0	0	0	0	0	0	0	0	0	0	0	1e-06	1e-06	1e-06	2e-06	3e-06	4e-06	6e-06	9e-06	1.3e-05	1.9e-05	2.7e-05	3.9e-05	5.5e-05	7.9e-05	0.000112	0.000158	0.000224	0.000315	0.000443	0.000621	0.000868	0.001211	0.001687	0.002345	0.003254	0.004508	0.006234	0.008608	0.011868	0.016337
VILHENA	RO	-12.6942	-60.0972	0.431655	0	0	0	0	0	0	0	0	0	0	0	0	0	0	0	0	0	1e-06	1e-06	1e-06	2e-06	3e-06	4e-06	6e-06	8e-06	1.2e-05	1.7e-05	2.4e-05	3.4e-05	4.9e-05	6.9e-05	9.7e-05	0.000136	0.000191	0.000268	0.000374	0.000521	0.000725	0.001007	0.001396	0.001931	0.002668	0.003679	0.005067	0.006968
VITORIA	ES	-20.2581	-40.2864	0.481928	0	0	0	0	1e-06	2e-06	4e-06	7e-06	1.2e-05	1.9e-05	2.9e-05	4.3e-05	6.4e-05	9.4e-05	0.000137	0.000196	0.000279	0.000396	0.000557	0.00078	0.001088	0.001512	0.002093	0.002889	0.003977	0.00546	0.007479	0.010223	0.013948	0.018997	0.025831	0.03507	0.047546	0.064375	0.08705	0.117568	0.158597	0.213696	0.287601	0.386607	0.51905	0.695941	0.931759	1.24545	1.66163
GOIANIA	MG	-21.5131	-43.1731	0.447761	0	0	0	0	0	0	0	0	0	0	0	0	0	0	0	0	0	1e-06	1e-06	1e-06	2e-06	3e-06	4e-06	6e-06	9e-06	1.4e-05	2e-05	2.9e-05	4.1e-05	5.9e-05	8.5e-05	0.000121	0.000171	0.000242	0.000342	0.000482	0.000678	0.000951	0.001332	0.001862	0.002598	0.003618	0.005032	0.006988	0.009688
BARRETOS	SP	-20.5856	-48.5958	0.393443	0	0	0	0	0	0	0	0	0	0	0	1e-06	1e-06	1e-06	2e-06	3e-06	4e-06	5e-06	7e-06	1e-05	1.4e-05	2e-05	2.8e-05	3.8e-05	5.3e-05	7.2e-05	9.8e-05	0.000134	0.000183	0.000249	0.000337	0.000457	0.000619	0.000836	0.001128	0.001521	0.002047	0.002754	0.0037	0.004965	0.006656	0.008914	0.011924	0.015932	0.021259
BARREIRAS	BA	-12.0792	-45.0094	0.424028	0	0	0	0	0	0	0	0	0	0	0	1e-06	1e-06	2e-06	2e-06	4e-06	5e-06	8e-06	1.1e-05	1.6e-05	2.3e-05	3.3e-05	4.6e-05	6.6e-05	9.2e-05	0.00013	0.000182	0.000254	0.000354	0.000493	0.000685	0.00095	0.001314	0.001816	0.002505	0.003451	0.004747	0.006523	0.008951	0.012268	0.016795	0.022966	0.031371	0.042806	0.058343
DIAMANTINA	MG	-18.2322	-43.6503	0.350877	0	0	0	0	0	0	0	0	0	0	0	0	0	0	0	0	0	0	0	0	0	0	0	0	0	0	0	0	0	0	0	1e-06	1e-06	1e-06	2e-06	2e-06	3e-06	5e-06	7e-06	9e-06	1.3e-05	1.8e-05	2.5e-05	3.5e-05	4.8e-05
DIVINOPOLIS	MG	-20.1819	-44.87	0.413793	0	0	0	0	0	0	0	0	0	0	0	0	0	0	0	0	0	0	0	0	0	0	1e-06	1e-06	1e-06	2e-06	3e-06	4e-06	6e-06	9e-06	1.3e-05	1.8e-05	2.6e-05	3.6e-05	5.1e-05	7.3e-05	0.000102	0.000143	0.000201	0.000281	0.000393	0.000548	0.000763	0.001061	0.001473
SERRA TALHADA	PE	-8.06139	-38.3286	0.365854	0	0	0	0	0	0	0	0	0	0	0	0	0	0	0	0	0	0	0	1e-06	1e-06	1e-06	2e-06	3e-06	4e-06	5e-06	7e-06	9e-06	1.3e-05	1.8e-05	2.5e-05	3.4e-05	4.7e-05	6.5e-05	8.8e-05	0.000121	0.000165	0.000226	0.000308	0.00042	0.000571	0.000776	0.001054	0.00143	0.001938
PATOS DE MINAS	MG	-18.6722	-46.4914	0.425532	0	0	0	0	0	0	0	0	0	0	0	0	0	0	0	0	0	0	0	0	0	0	1e-06	1e-06	1e-06	2e-06	2e-06	3e-06	5e-06	7e-06	1e-05	1.4e-05	2e-05	2.8e-05	3.9e-05	5.5e-05	7.6e-05	0.000107	0.000148	0.000206	0.000286	0.000396	0.000547	0.000755	0.001041
TEIXEIRA DE FREITAS	BA	-17.5244	-39.6683	0.410959	0	0	0	0	0	0	0	0	0	0	0	0	0	0	0	1e-06	1e-06	2e-06	2e-06	4e-06	5e-06	8e-06	1.1e-05	1.6e-05	2.3e-05	3.3e-05	4.6e-05	6.6e-05	9.4e-05	0.000132	0.000186	0.000262	0.000367	0.000514	0.000717	0.000999	0.001389	0.001928	0.002671	0.003695	0.005103	0.007037	0.009691	0.013327	0.018302
VALENA	BA	-13.2964	-38.9925	0.402685	0	0	0	0	0	0	0	0	0	0	0	0	0	0	0	0	1e-06	1e-06	1e-06	2e-06	3e-06	5e-06	7e-06	1.1e-05	1.5e-05	2.2e-05	3.2e-05	4.5e-05	6.5e-05	9.2e-05	0.00013	0.000184	0.000259	0.000364	0.00051	0.000713	0.000995	0.001385	0.001926	0.002672	0.003702	0.005119	0.007069	0.009745	0.013415
CACOAL	RO	-11.4956	-61.4508	0.368098	0	0	0	0	0	0	0	0	0	0	0	0	0	0	0	0	0	1e-06	1e-06	1e-06	2e-06	3e-06	5e-06	7e-06	1e-05	1.4e-05	2.1e-05	3e-05	4.2e-05	6e-05	8.5e-05	0.000119	0.000168	0.000235	0.00033	0.00046	0.000642	0.000893	0.001239	0.001718	0.002377	0.003283	0.004528	0.006236	0.008576
PONTA GROSSA	PR	-25.1844	-50.1439	0.413793	0	0	0	0	0	0	0	0	0	0	0	0	0	0	0	0	0	0	0	1e-06	1e-06	1e-06	2e-06	3e-06	4e-06	7e-06	1e-05	1.4e-05	2e-05	2.8e-05	4.1e-05	5.8e-05	8.2e-05	0.000116	0.000165	0.000232	0.000327	0.000459	0.000644	0.000901	0.001258	0.001755	0.002443	0.003396	0.004713
BARCELOS	AM	-0.980833	-62.9189	0.361446	0	0	0	0	0	0	0	0	0	0	0	0	0	0	0	0	0	0	1e-06	1e-06	1e-06	2e-06	3e-06	4e-06	6e-06	8e-06	1.2e-05	1.7e-05	2.4e-05	3.3e-05	4.7e-05	6.7e-05	9.4e-05	0.000131	0.000184	0.000257	0.000358	0.000497	0.00069	0.000956	0.001321	0.001825	0.002515	0.003463	0.004759
CARAUARI	AM	-4.87139	-66.8975	0.361446	0	0	0	0	0	0	0	0	0	0	0	0	0	0	0	0	0	0	1e-06	1e-06	1e-06	2e-06	2e-06	4e-06	5e-06	7e-06	1.1e-05	1.5e-05	2.1e-05	3e-05	4.3e-05	6.1e-05	8.5e-05	0.000119	0.000167	0.000233	0.000325	0.000452	0.000627	0.000868	0.001201	0.001658	0.002285	0.003146	0.004324
EIRUNEPI	AM	-6.6375	-69.8831	0.28777	0	0	0	0	0	0	0	0	0	0	0	0	0	0	0	0	0	0	0	0	0	0	0	0	0	0	0	0	0	0	0	0	0	1e-06	1e-06	1e-06	2e-06	2e-06	3e-06	5e-06	7e-06	9e-06	1.3e-05	1.9e-05	2.6e-05
ARAGUAINA	TO	-7.22833	-48.2408	0.319149	0	0	0	0	0	0	0	0	0	0	0	0	0	0	0	0	0	0	0	0	0	0	0	0	0	0	0	0	1e-06	1e-06	1e-06	2e-06	3e-06	5e-06	7e-06	1e-05	1.4e-05	2e-05	2.9e-05	4.2e-05	5.9e-05	8.5e-05	0.00012	0.00017	0.000241
COARI	AM	-4.13389	-63.1311	0.352941	0	0	0	0	0	0	0	0	0	0	0	0	0	0	0	0	0	0	0	1e-06	1e-06	1e-06	2e-06	3e-06	4e-06	6e-06	8e-06	1.2e-05	1.7e-05	2.4e-05	3.4e-05	4.8e-05	6.8e-05	9.6e-05	0.000134	0.000187	0.00026	0.000361	0.000501	0.000695	0.00096	0.001326	0.001828	0.002517	0.003459
LABREA	AM	-7.25028	-64.7839	0.352941	0	0	0	0	0	0	0	0	0	0	0	0	0	0	0	0	0	0	0	1e-06	1e-06	1e-06	2e-06	2e-06	4e-06	5e-06	7e-06	1.1e-05	1.5e-05	2.1e-05	3e-05	4.2e-05	6e-05	8.4e-05	0.000117	0.000163	0.000227	0.000316	0.000439	0.000608	0.00084	0.00116	0.0016	0.002202	0.003027
RIO VERDE	GO	-17.8347	-50.9561	0.418118	0	0	0	0	0	0	0	0	0	0	0	0	0	0	0	0	0	0	0	1e-06	1e-06	1e-06	2e-06	3e-06	4e-06	6e-06	9e-06	1.3e-05	1.9e-05	2.7e-05	3.8e-05	5.4e-05	7.7e-05	0.000109	0.000154	0.000218	0.000306	0.00043	0.000603	0.000844	0.00118	0.001645	0.00229	0.003184	0.004419
PARINTINS	AM	-2.66944	-56.7711	0.353982	0	0	0	0	0	0	0	0	0	0	0	0	0	0	0	0	0	0	1e-06	1e-06	1e-06	2e-06	3e-06	5e-06	7e-06	1e-05	1.4e-05	2e-05	2.8e-05	3.9e-05	5.6e-05	7.9e-05	0.000111	0.000155	0.000217	0.000303	0.000422	0.000587	0.000815	0.001129	0.001561	0.002156	0.002972	0.004091	0.005623
SINOP	MT	-11.885	-55.5861	0.368098	0	0	0	0	0	0	0	0	0	0	0	0	0	0	0	0	0	1e-06	1e-06	1e-06	2e-06	3e-06	5e-06	7e-06	1e-05	1.4e-05	2.1e-05	3e-05	4.2e-05	6e-05	8.5e-05	0.000119	0.000168	0.000235	0.00033	0.00046	0.000642	0.000893	0.001239	0.001718	0.002377	0.003283	0.004528	0.006236	0.008576
[truncated: 45 more columns]
